# Supplementary material for: Model studies of the (6–4) photoproduct photoreactivation: efficient photosensitized splitting of thymine oxetane units by covalently linked tryptophan in high polarity solvents
Source: Royal Society of Chemistry journal article supplement (doi:10.1039/b514921e), 2005-12-07

Supporting Information for

Model Studies of the (6–4) Photoproduct  
Photoreactivation: Efficient Photosensitized Splitting of  
Thymine Oxetane Units by Covalently Linked  
Tryptophan in High Polarity Solvents

**Table of contents:**

- UV absorption spectra and/or fluorescence emission spectra of compound **2a**, **3**, **8b** and **10** S2
- The detail for measurement of the splitting quantum yield S2
- <sup>1</sup>H NMR spectra of compounds **4**, **5**, **8a**, **8b**, **1**, **2a**, **2b** and **3** S3–S10
- <sup>13</sup>C NMR spectra of compounds **4**, **5**, **8a**, **8b**, **1**, **2a**, **2b** and **3** S11–S18

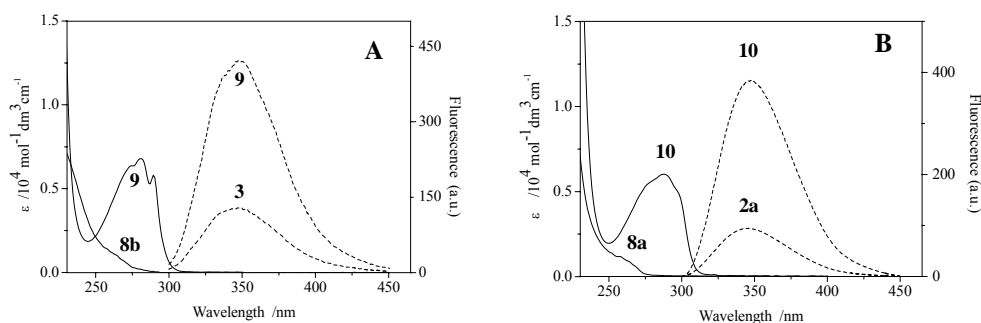

**Fig. S1** UV absorption spectra (solid) and/or fluorescence emission spectra (dash) ( $\lambda_{\text{ex}} = 290 \text{ nm}$ ) of compounds **9**, **8b** and **3** (A), **10**, **8a** and **2a** (B), in methanol.

### The detail for measurement of splitting quantum yields

The absorbances at 270 nm ( $A_{270}$ ) were measured at certain time intervals. The  $A_{270}$  change ( $\Delta A_{270}$ ) of the solution depends on the splitting reaction. The change of mole extinction coefficients ( $\Delta \epsilon_{270}$ ) were obtained from those measured of model compounds **1–3** and the splitting products **4**, **5** and benzophenone or benzaldehyde at 270 nm, and the value of  $\Delta \epsilon_{270}$  employed was  $1.80 \times 10^4 \text{ mol}^{-1} \text{ cm}^{-1} \text{ dm}^{-3}$  for **1** and **2**,  $1.18 \times 10^4 \text{ mol}^{-1} \text{ cm}^{-1} \text{ dm}^{-3}$  for **3**, respectively. The splitting concentration ( $c_{\text{spl}}$ ) of the model compound was obtained from  $\Delta A_{270} / \Delta \epsilon_{270}$ . The plot of  $c_{\text{spl}}$  against the irradiation time ( $t$ , min) is fitted as a well straight line. The rate of splitting reaction was obtained from the slope (B) of the line (Fig. S2). The intensity of the incident light  $I_0$  was measured using ferrioxalate actinometry. The rate of photon absorbed ( $I_a$ ) by solution was obtained in term of Beer's law,  $I_a = I_0 (1 - 10^{-A_{290}})$ . The absorbance of the model compound at 290 nm,  $A_{290}$  was determined before irradiation. Above these values allow the calculation of the quantum yield in terms of  $\Phi_{\text{spl}} = (\text{rate of oxetane split}) / (\text{rate of photon absorbed}) = BV_0 / I_a$ , wherein  $V_0$  was the volume of irradiation solution,  $3 \times 10^{-3} \text{ L}$ .

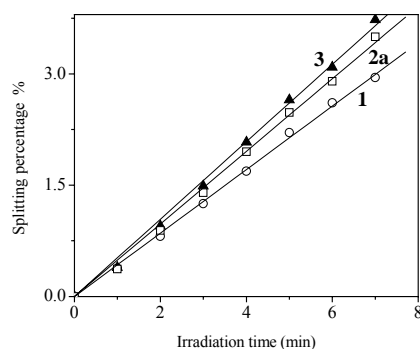

**Fig. S2** Splitting rates determined for the model compounds **1**( $\circ$ ), **2a**( $\square$ ) and **3**( $\blacktriangle$ ) in methanol.

**Figure S3** The  $^1\text{H}$  NMR spectrum of compound **4**

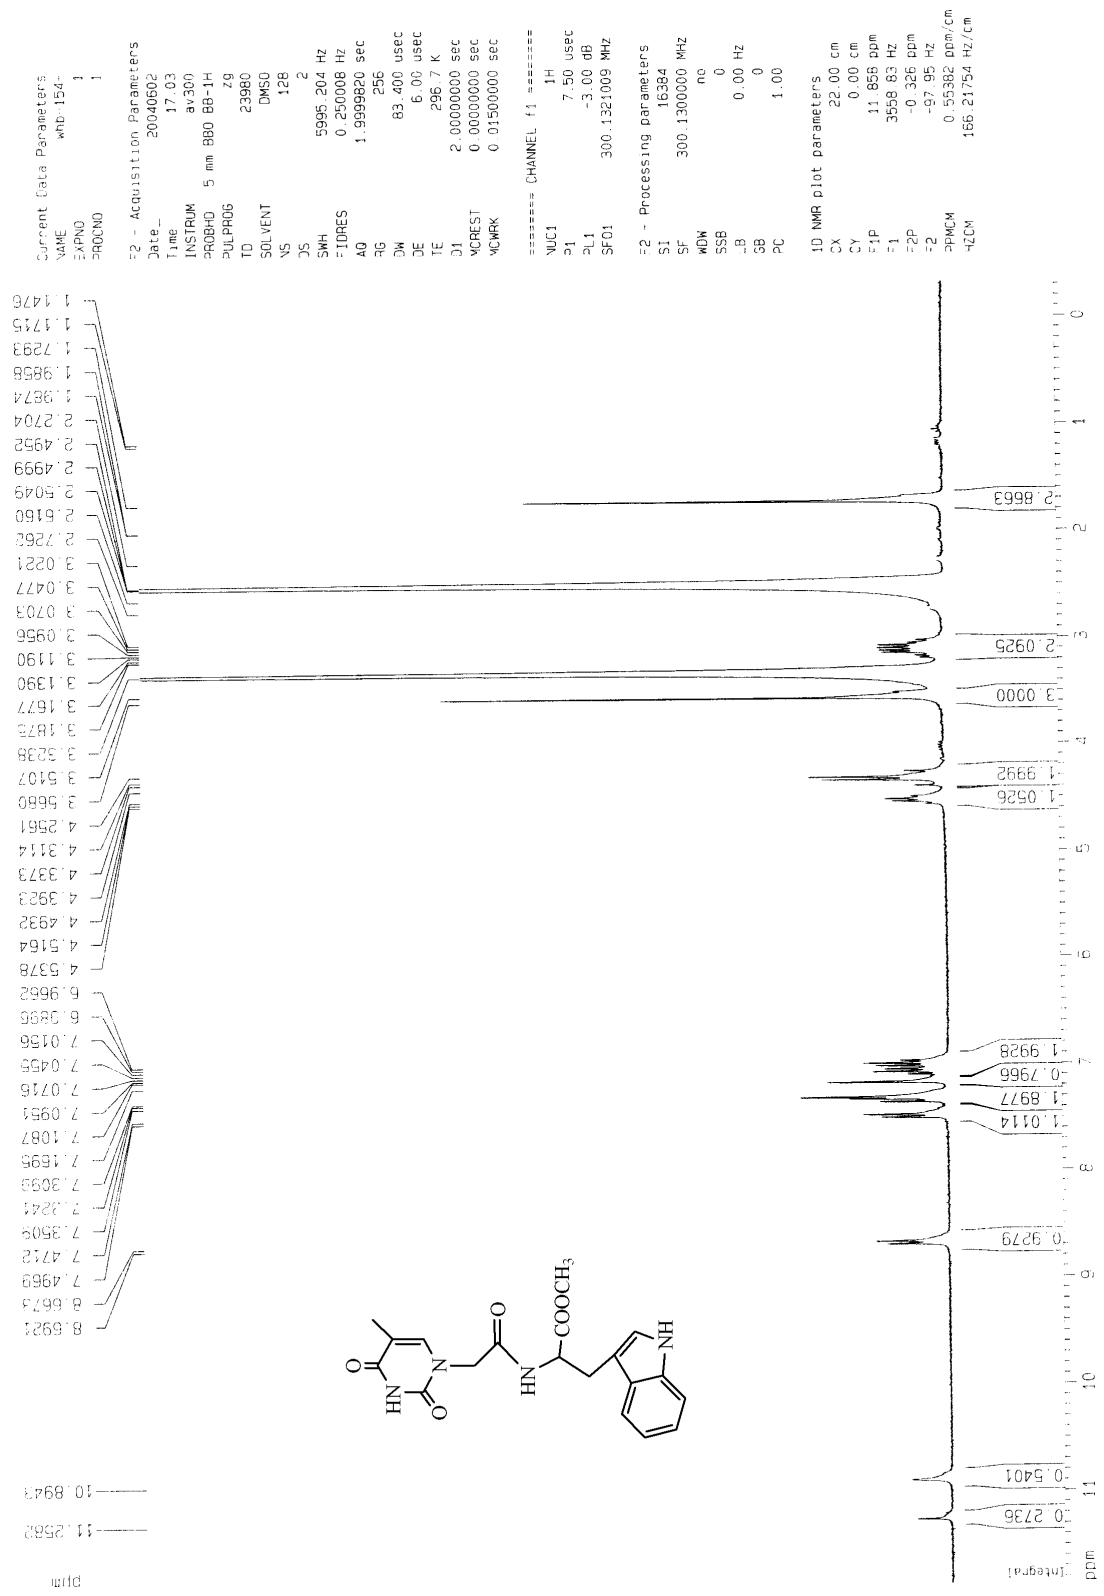

**Figure S4** The <sup>1</sup>H NMR spectrum of compound **5**

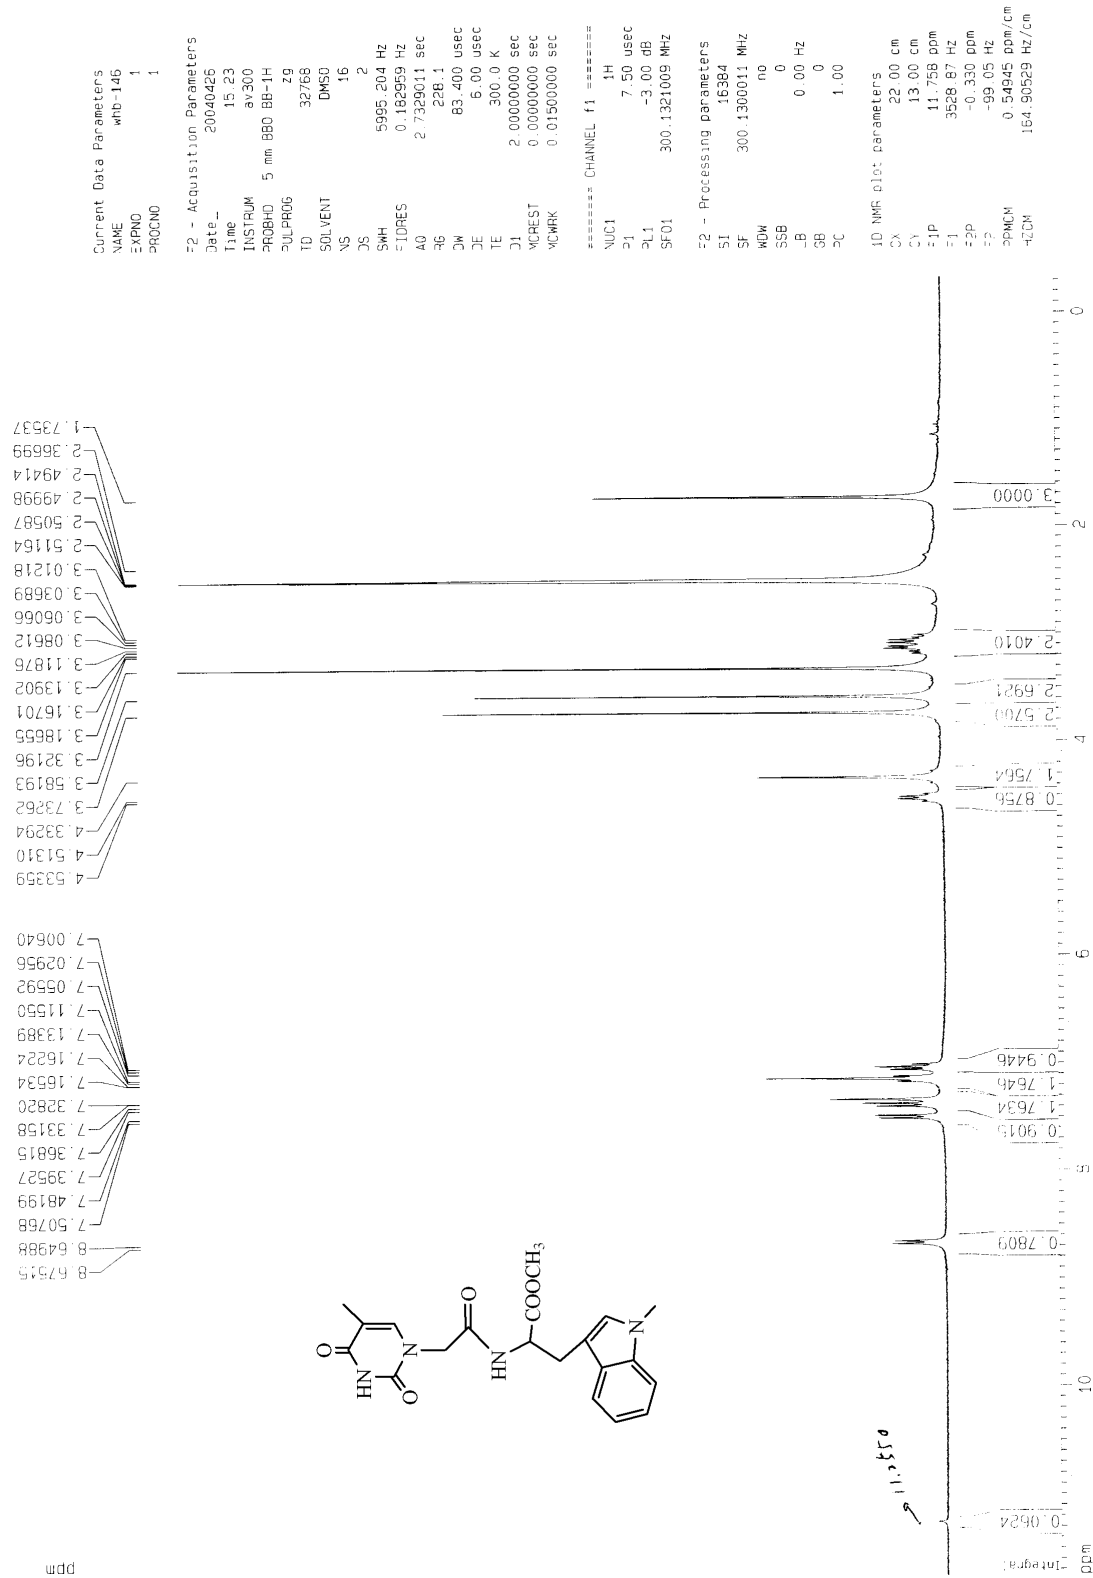

Figure S5 The <sup>1</sup>H NMR spectrum of compound 8a

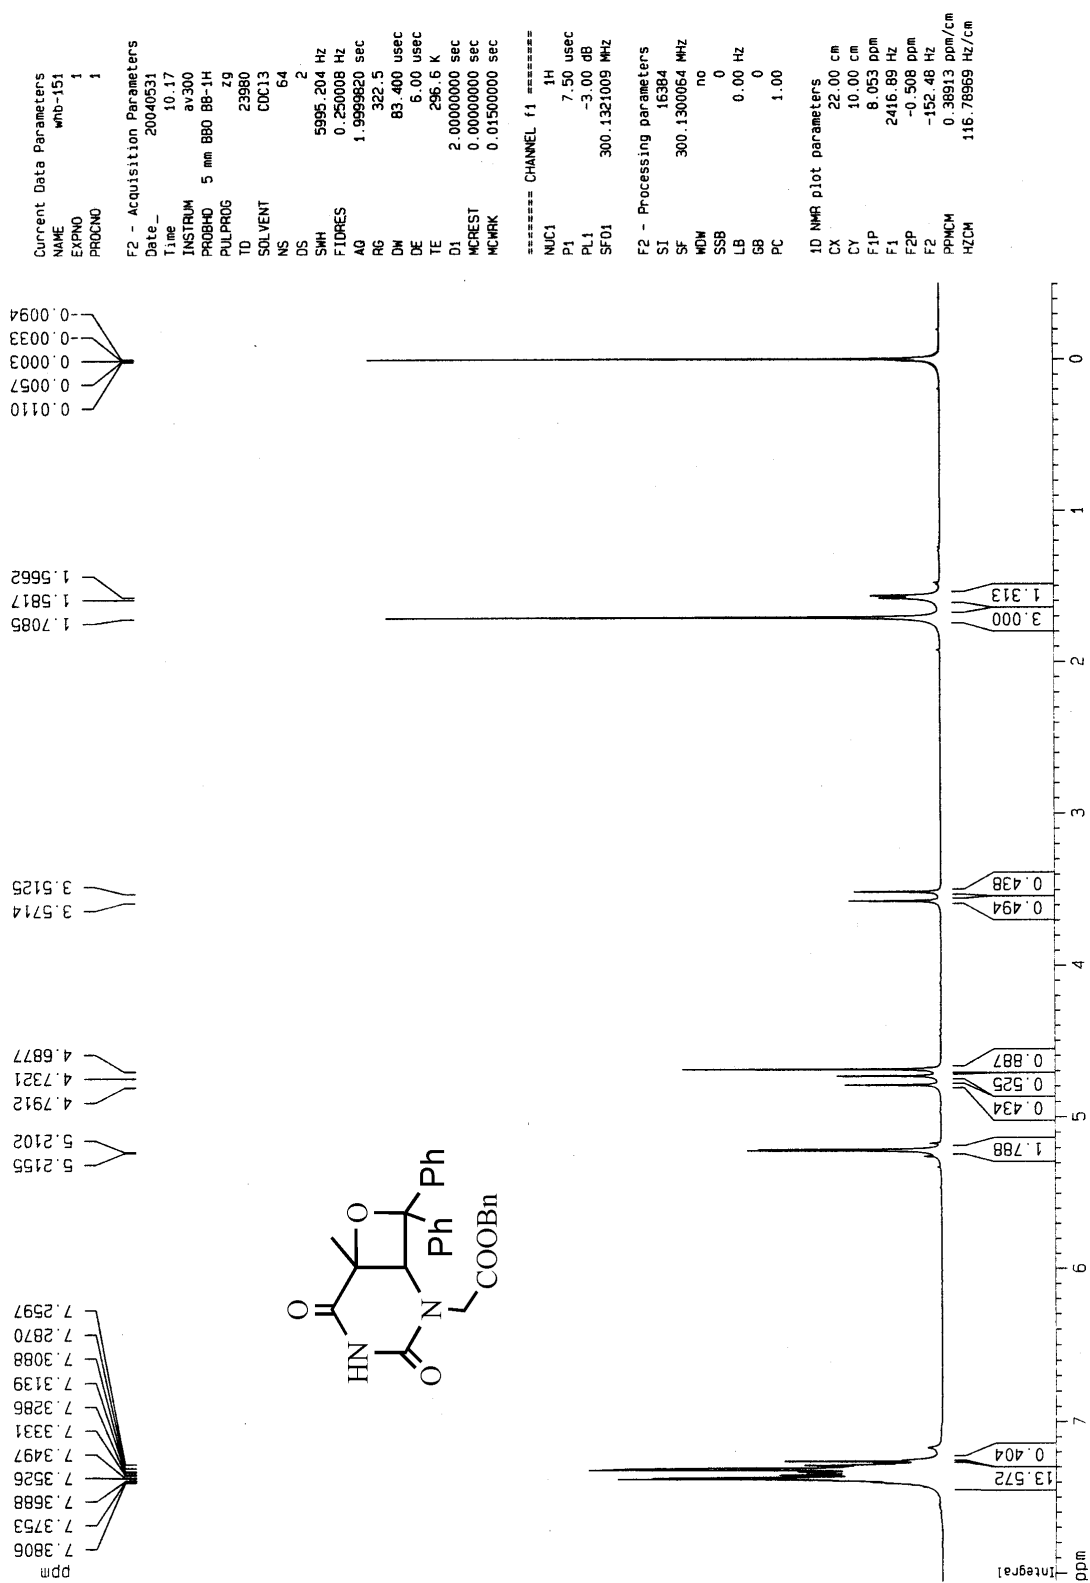

Figure S6 The <sup>1</sup>H NMR spectrum of compound 8b

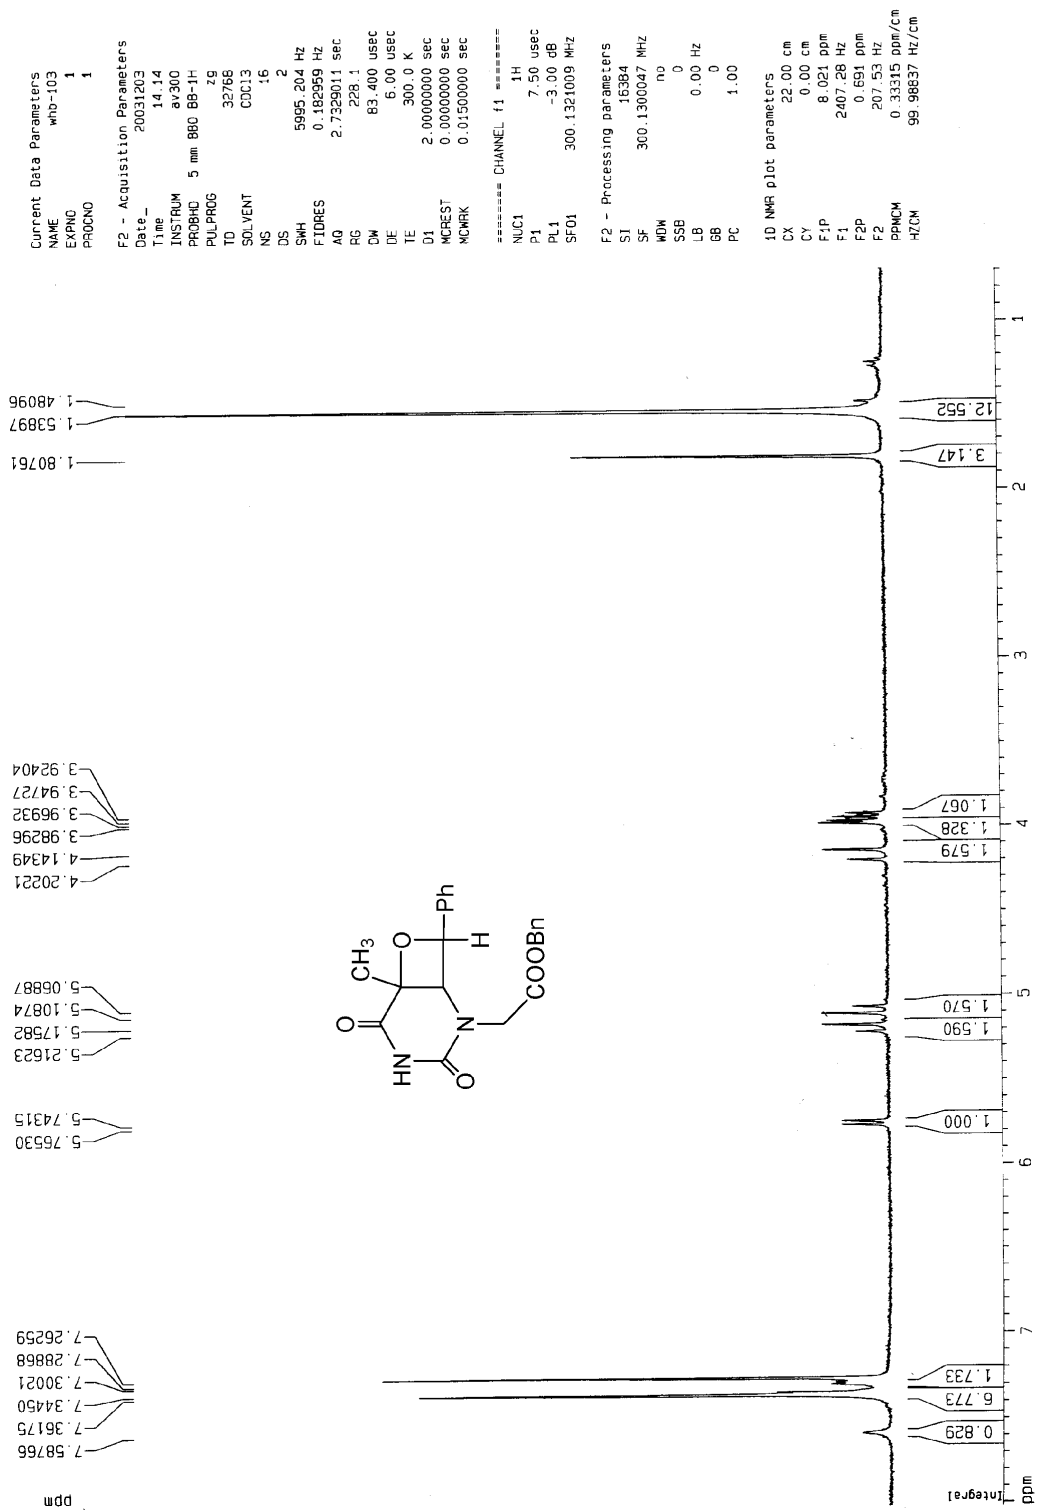

**Figure S7** The <sup>1</sup>H NMR spectrum of compound **1**

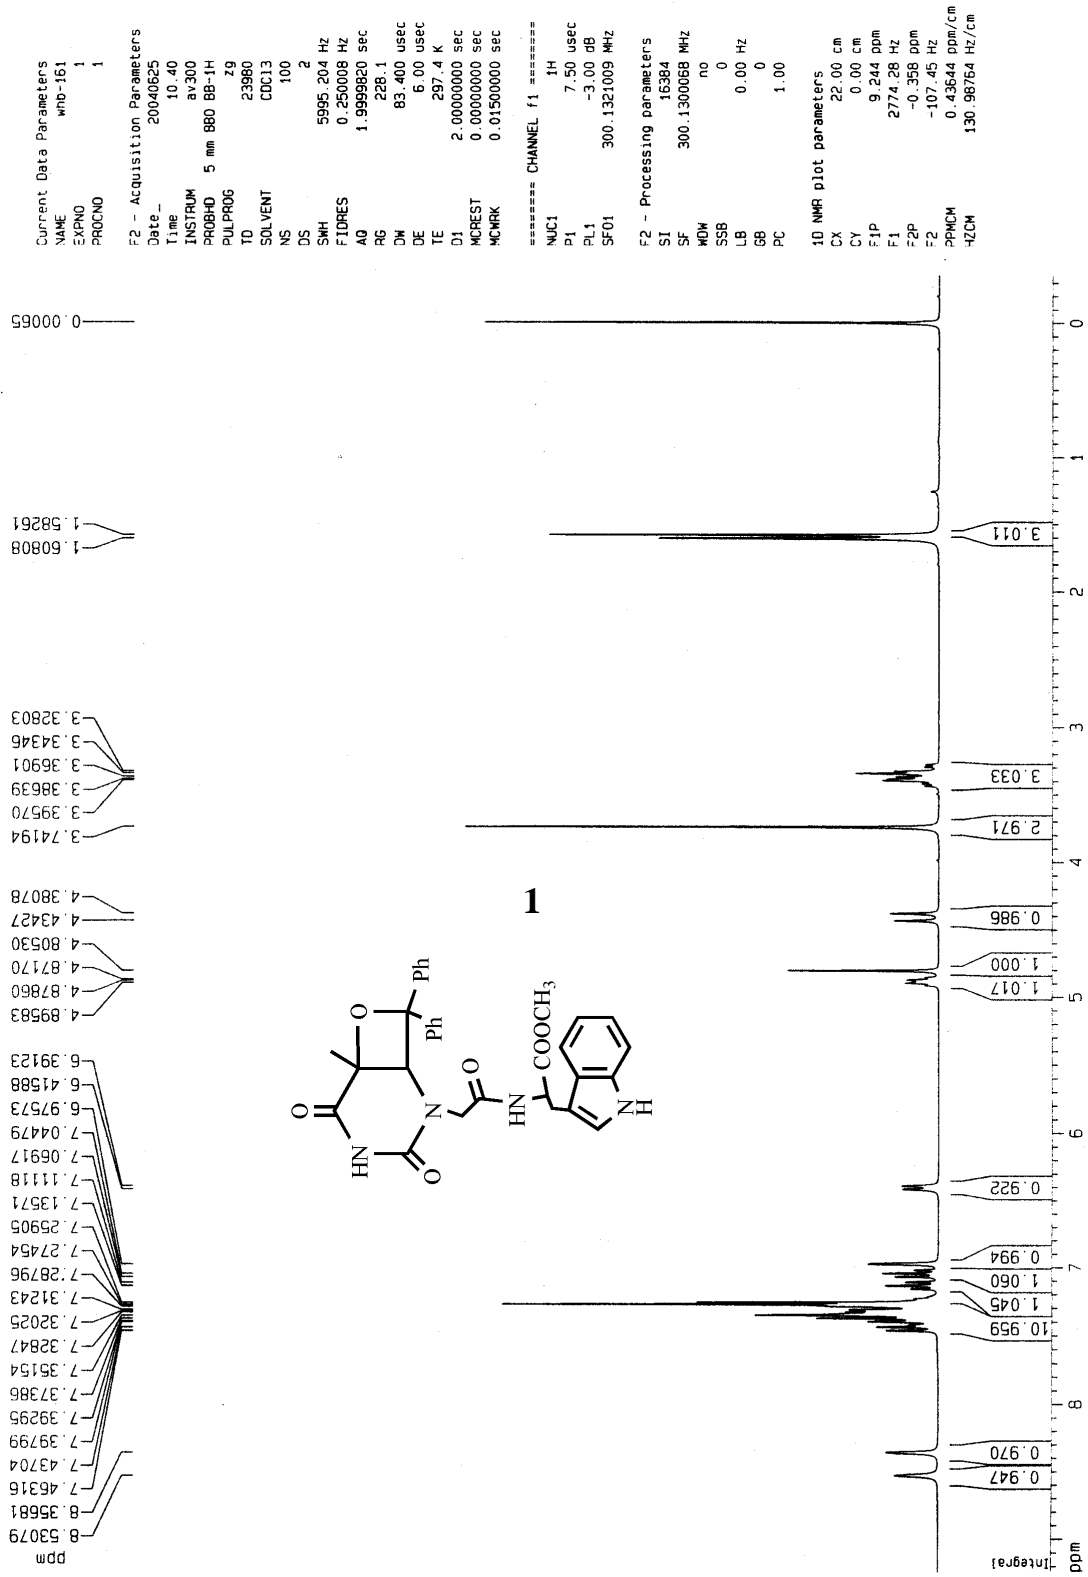

Figure S8 The <sup>1</sup>H NMR spectrum of compound 2a

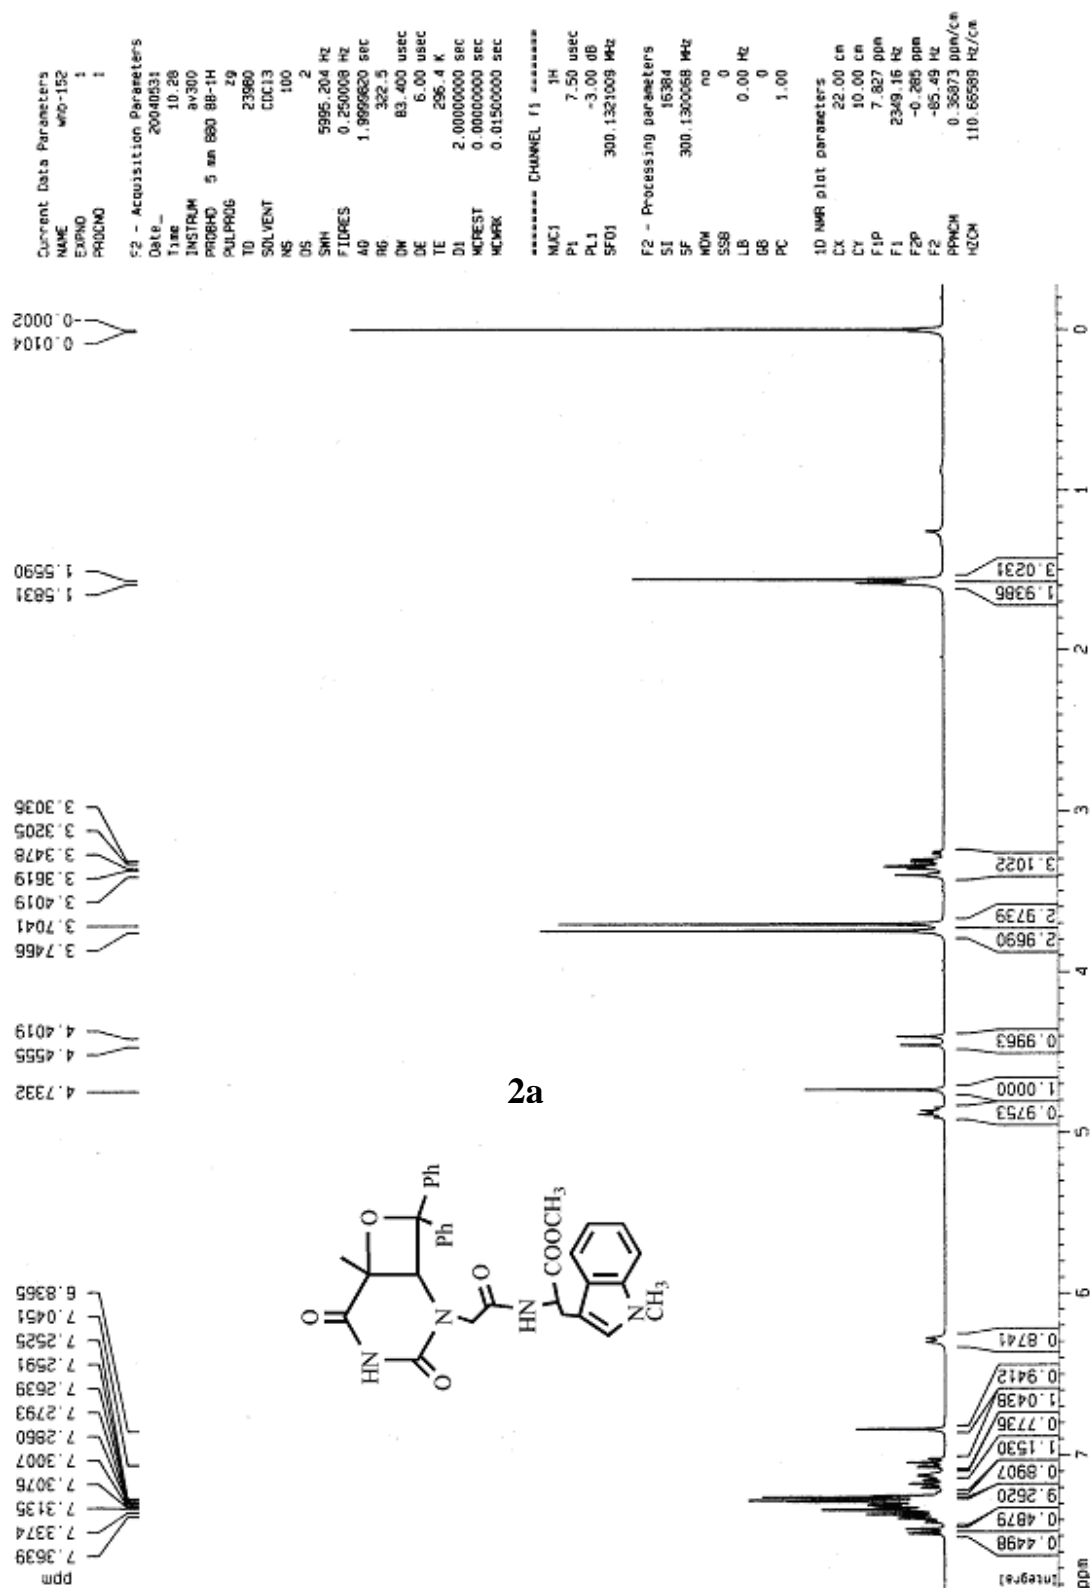

Figure S9 The <sup>1</sup>H NMR spectrum of compound 2b





**Figure S10** The <sup>1</sup>H NMR spectrum of compound **3**

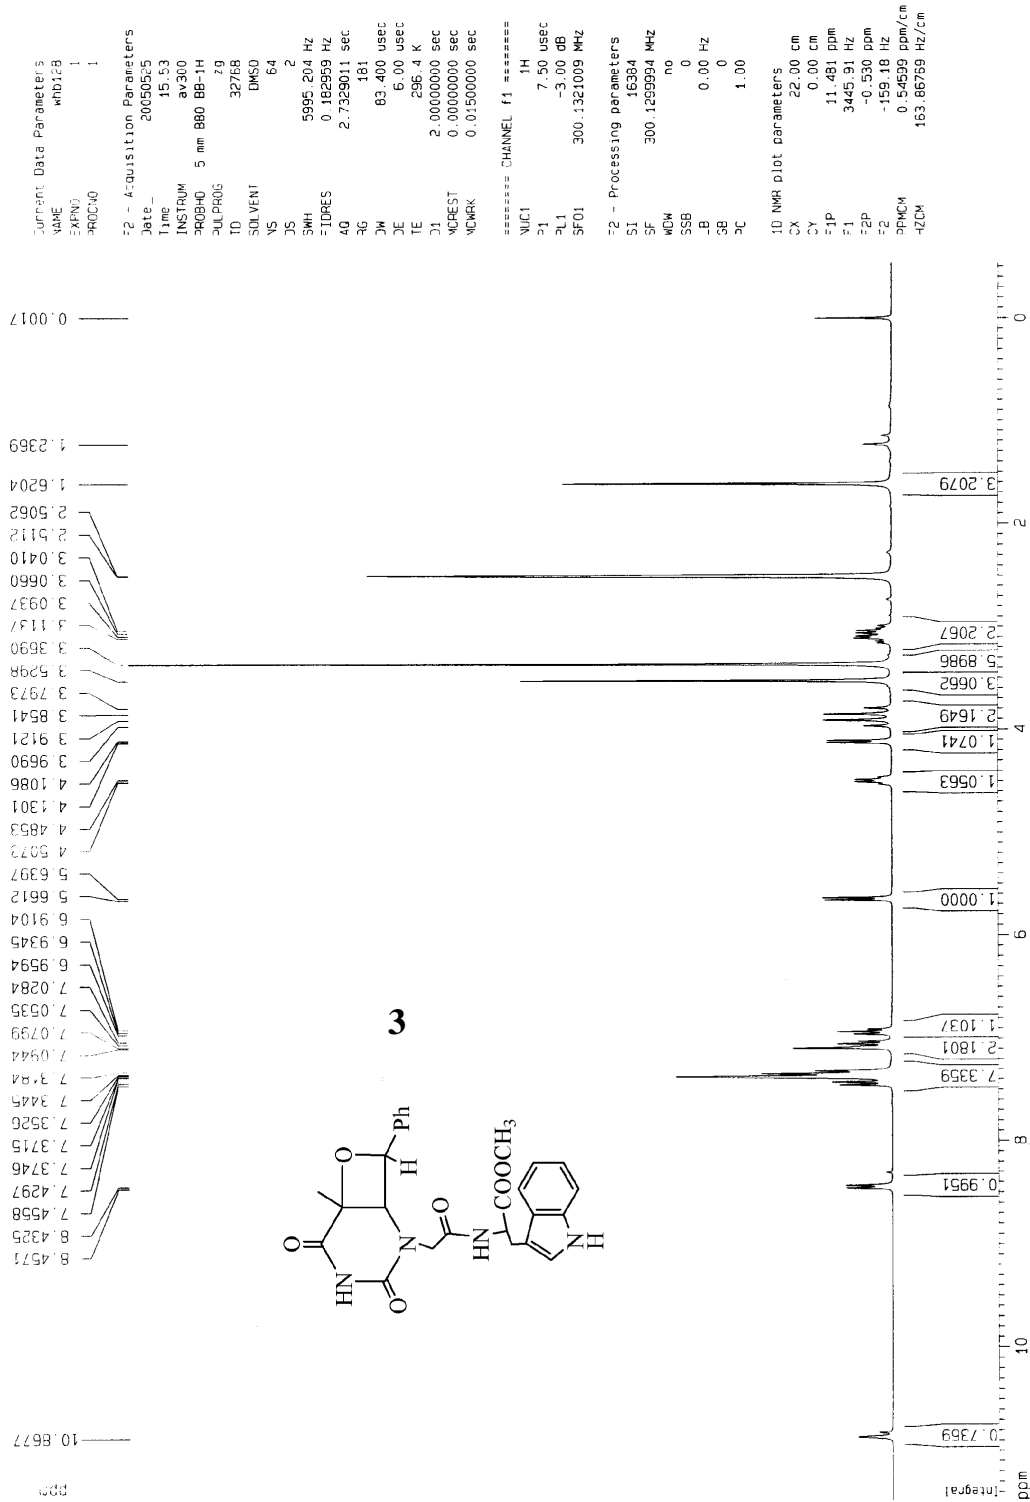

Figure S11 The  $^{13}\text{C}$  NMR spectrum of compound 4

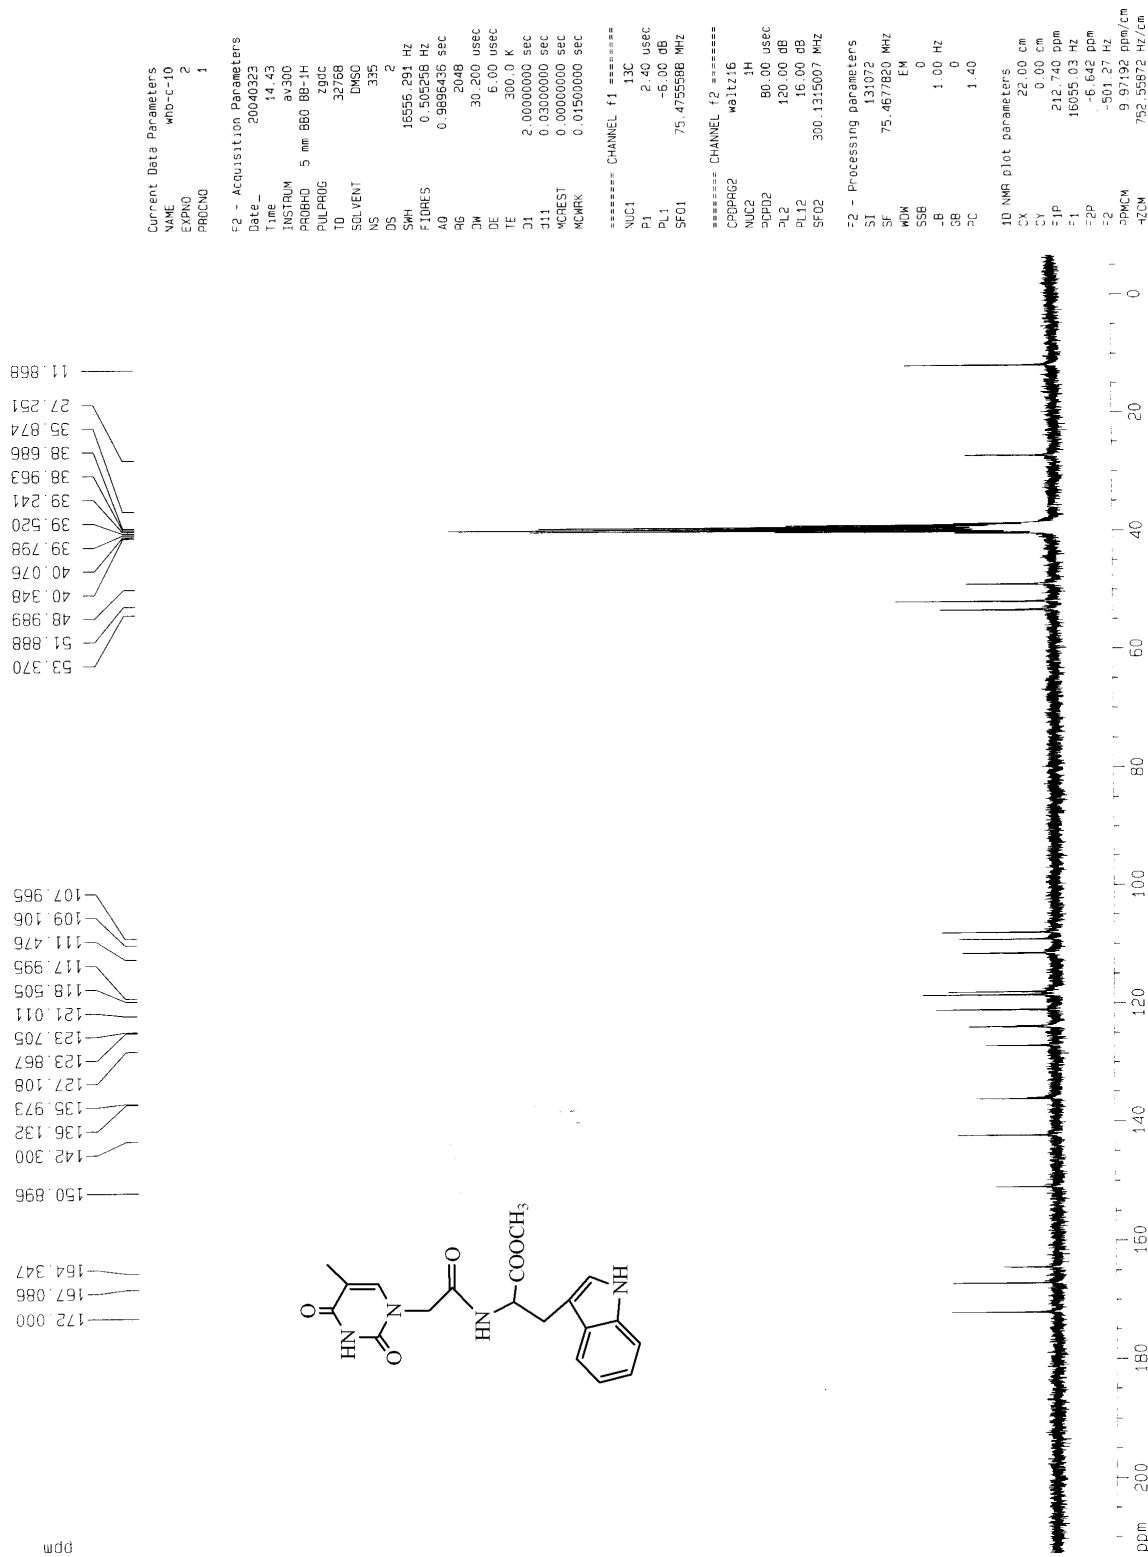

**Figure S12** The  $^{13}\text{C}$  NMR spectrum of compound **5**

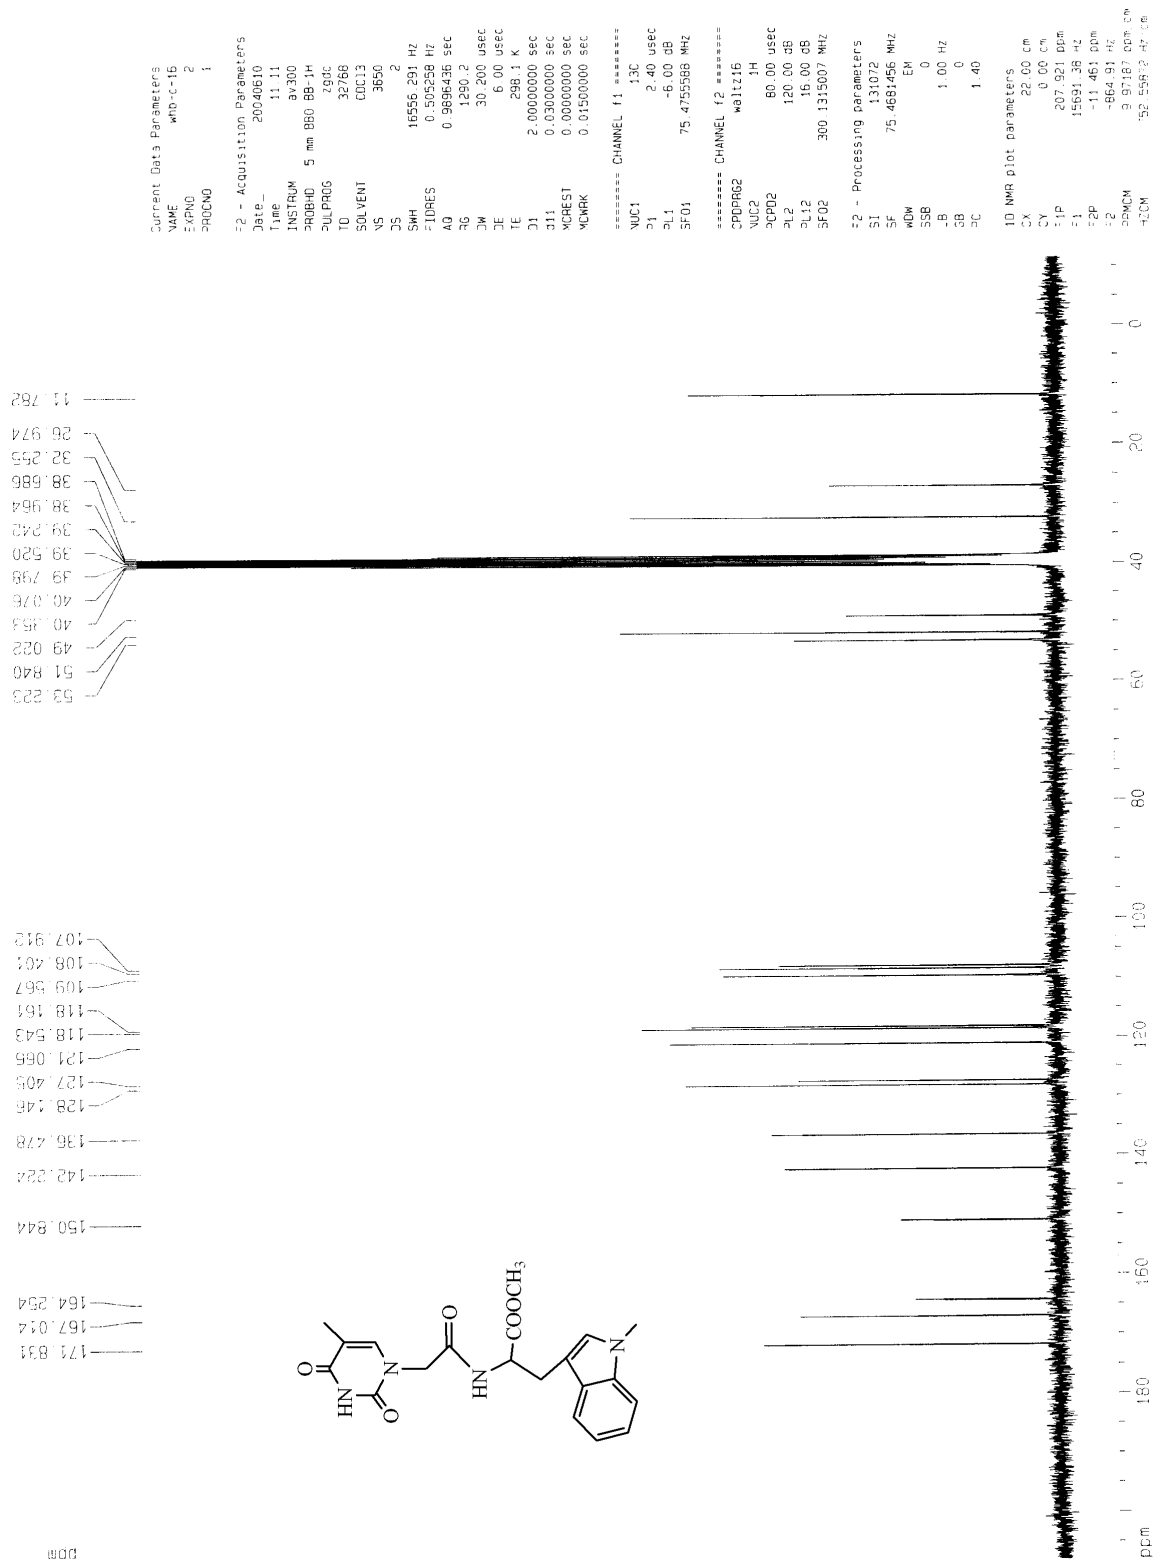

Figure S13 The  $^{13}\text{C}$  NMR spectrum of compound **8a**

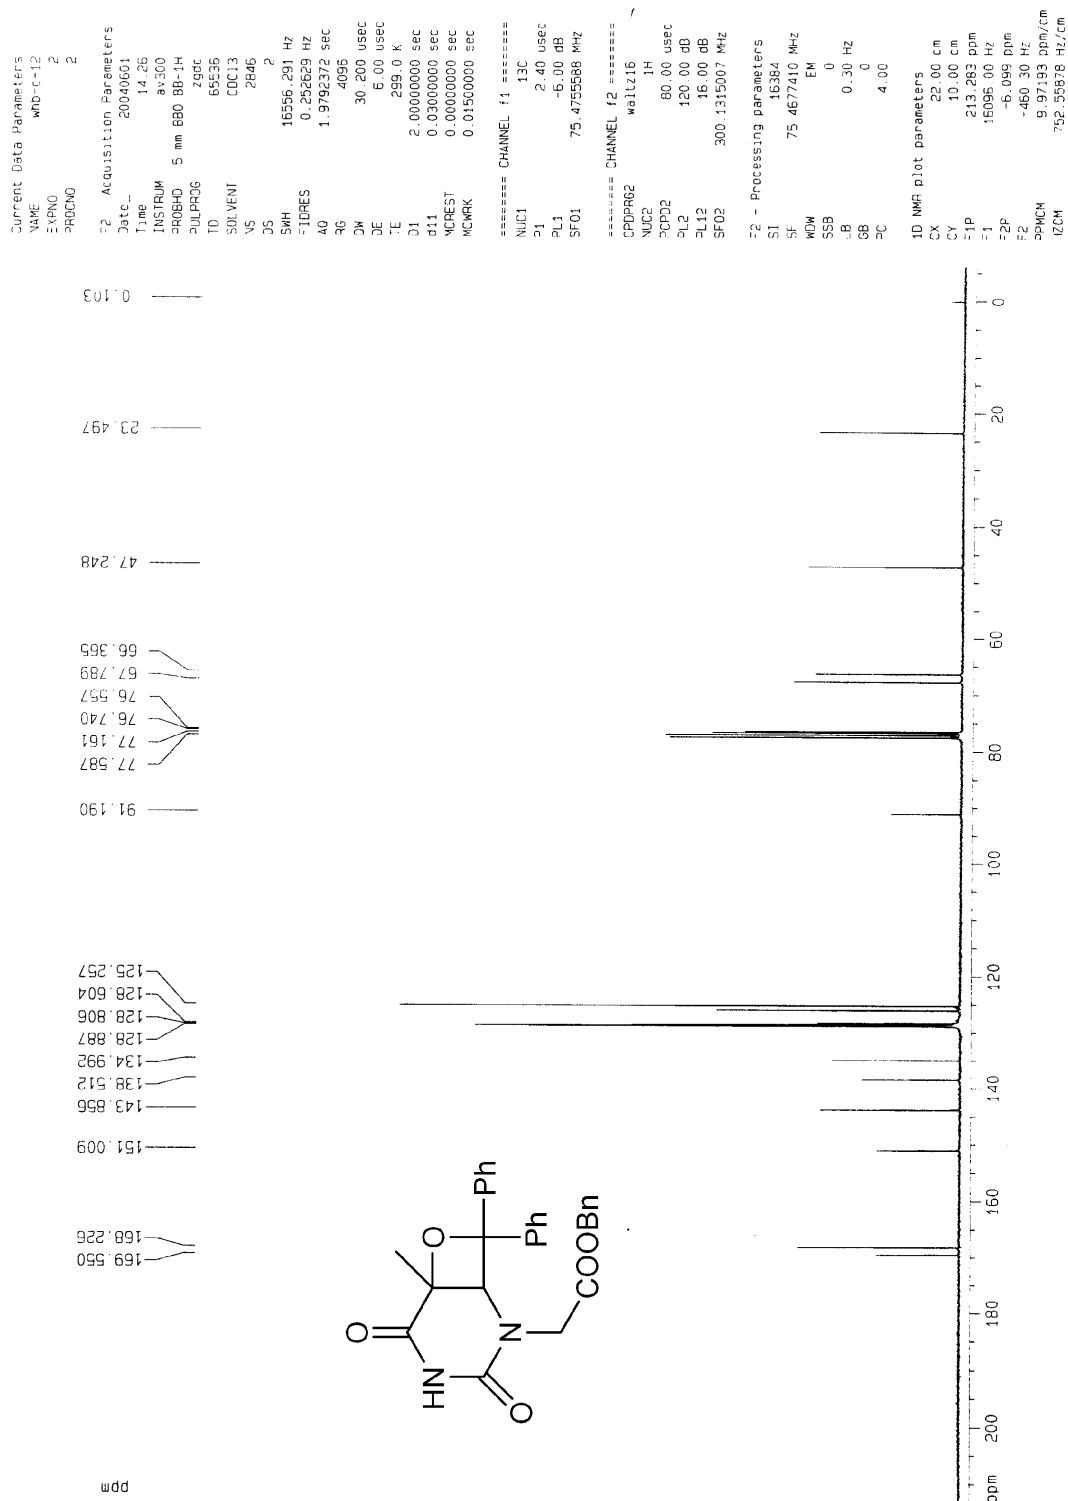

Figure S14 The <sup>13</sup>C NMR spectrum of compound 8b

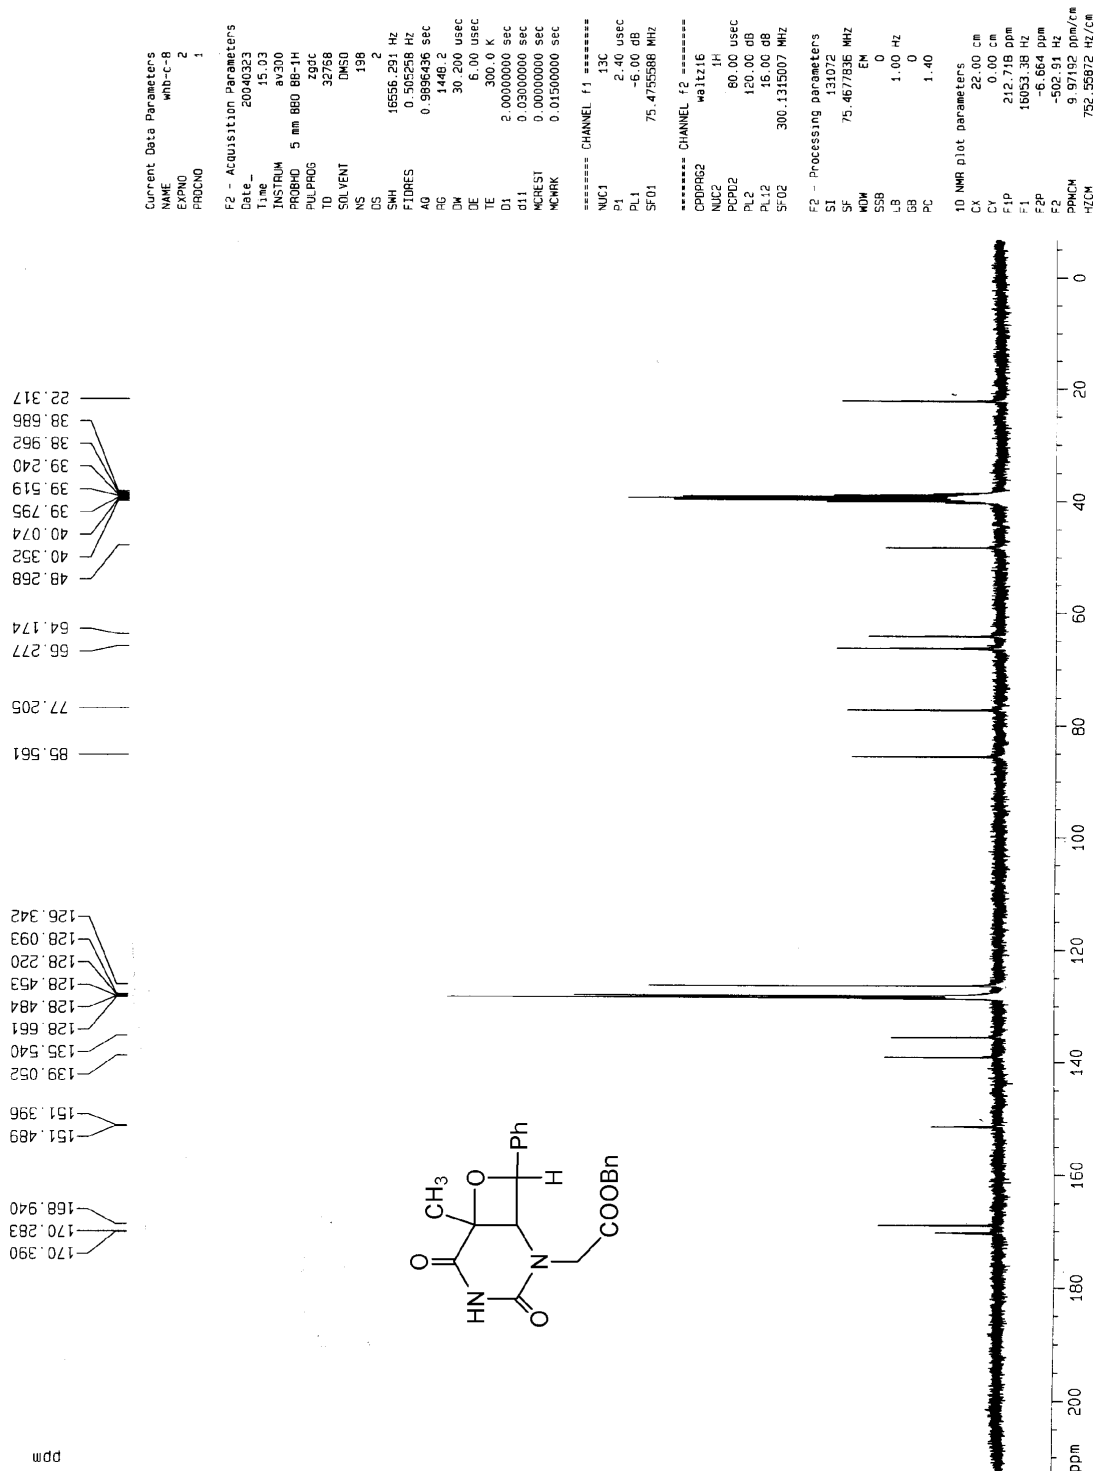



**Figure S16** The  $^{13}\text{C}$  NMR spectrum of compound **2a**

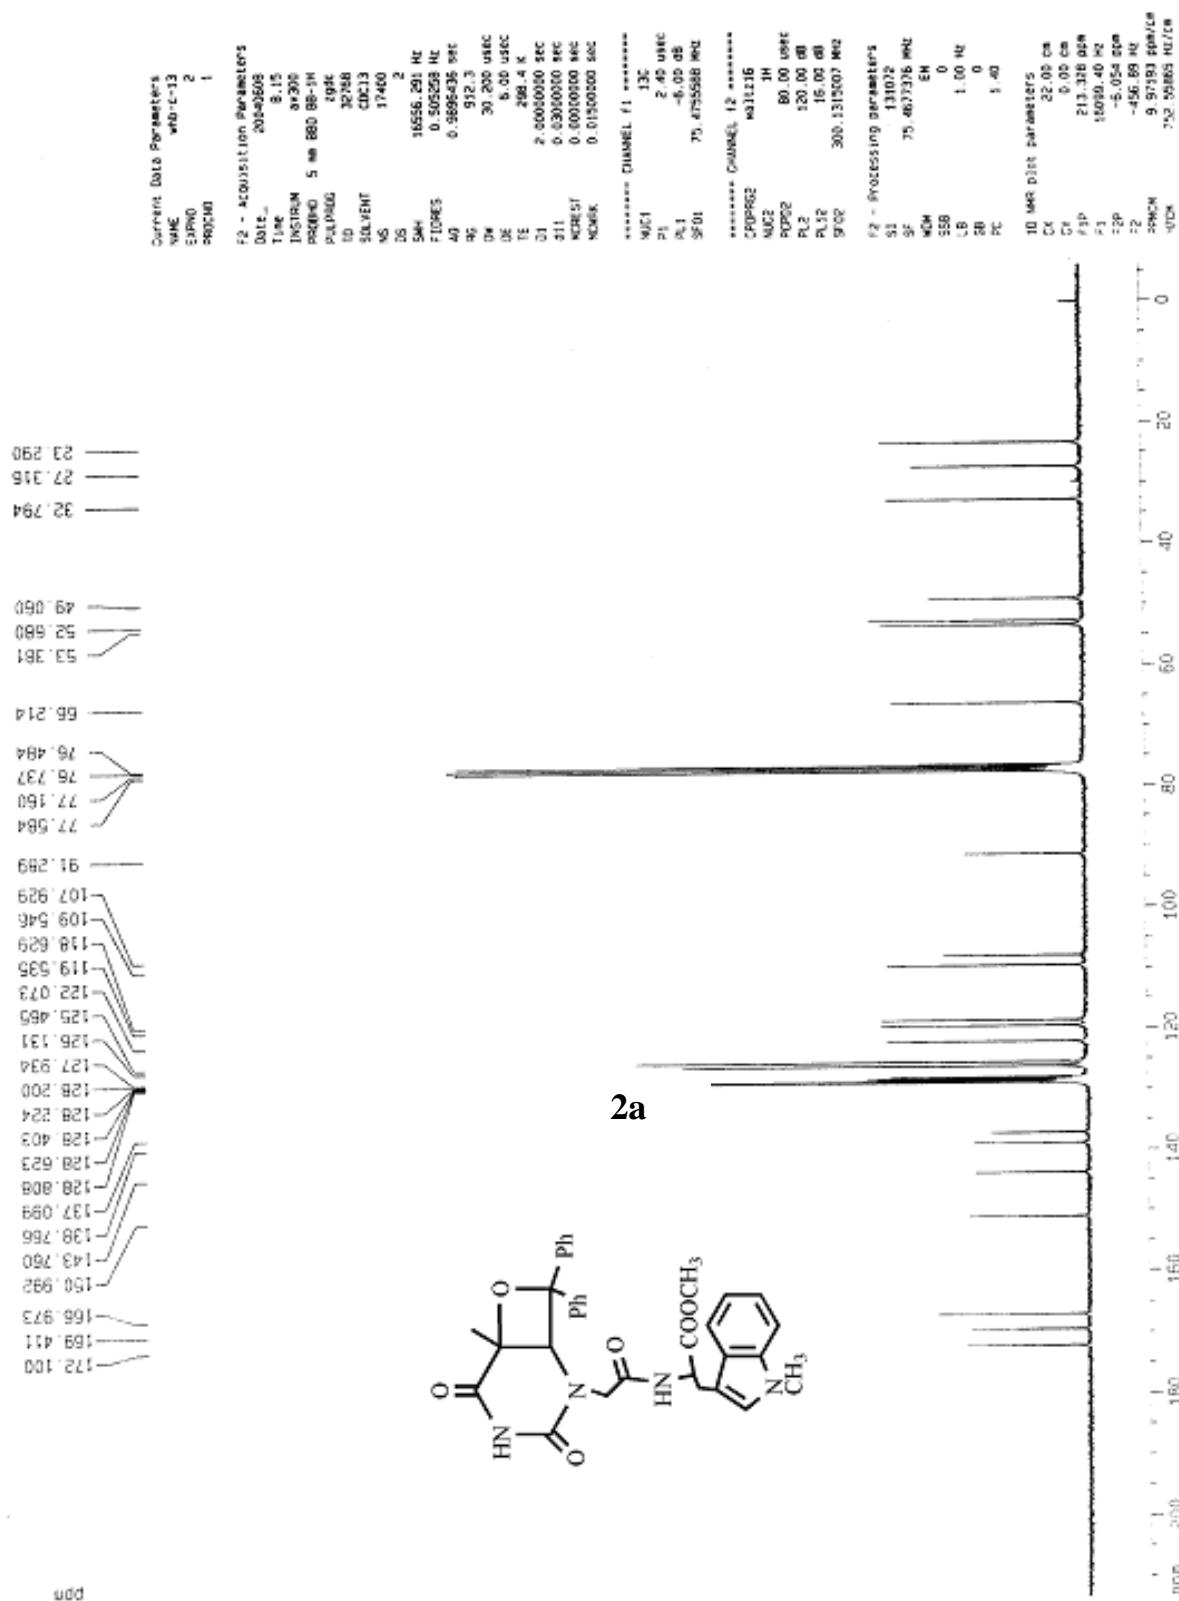

**Figure S17** The  $^{13}\text{C}$  NMR spectrum of compound **2b**



```

Current Data Parameters
NAME      MW0-22a
EXPNO    4
PROCNO   1

F2 - Acquisition Parameters
Date_    20050528
Time     17.31
INSTRUM  zg300
PROBHD   5 mm BBO BB-3H
PULPROG  zgpg30
TD        65536
SOLVENT  CDCl3
NS        15068
DS        4
SWH       22675.736 Hz
FIDRES   0.346004 Hz
AQ        1.4051188 sec
RG        5792.5
DM        22.050 uSAC
DE        6.00 uSAC
TE        300.0 K
D1        2.00000000 sec
d11       0.03000000 sec
ACQRES1  0.00000000 sec
AQRES1   0.01500000 sec

***** CHANNEL f1 *****
NUC1      13C
P1        3.00 usec
PL1       -1.00 dB
SFO1     75.4763051 MHz

***** CHANNEL f2 *****
CPDPRG2  waltz16
NUC2      13C
PCPD2     80.00 usec
PL2       -3.00 dB
PL12     15.00 dB
SFO2     300.1315007 MHz

F2 - Processing parameters
SI        131072
SF        75.467377 MHz
AQ        1.40
GB        0
GB1       0
GB2       0
GB3       0
GB4       0
GB5       0
GB6       0
GB7       0
GB8       0
GB9       0
GB10      0
GB11      0
GB12      0
GB13      0
GB14      0
GB15      0
GB16      0
GB17      0
GB18      0
GB19      0
GB20      0
GB21      0
GB22      0
GB23      0
GB24      0
GB25      0
GB26      0
GB27      0
GB28      0
GB29      0
GB30      0
GB31      0
GB32      0
GB33      0
GB34      0
GB35      0
GB36      0
GB37      0
GB38      0
GB39      0
GB40      0
GB41      0
GB42      0
GB43      0
GB44      0
GB45      0
GB46      0
GB47      0
GB48      0
GB49      0
GB50      0
GB51      0
GB52      0
GB53      0
GB54      0
GB55      0
GB56      0
GB57      0
GB58      0
GB59      0
GB60      0
GB61      0
GB62      0
GB63      0
GB64      0
GB65      0
GB66      0
GB67      0
GB68      0
GB69      0
GB70      0
GB71      0
GB72      0
GB73      0
GB74      0
GB75      0
GB76      0
GB77      0
GB78      0
GB79      0
GB80      0
GB81      0
GB82      0
GB83      0
GB84      0
GB85      0
GB86      0
GB87      0
GB88      0
GB89      0
GB90      0
GB91      0
GB92      0
GB93      0
GB94      0
GB95      0
GB96      0
GB97      0
GB98      0
GB99      0
GB100     0
GB101     0
GB102     0
GB103     0
GB104     0
GB105     0
GB106     0
GB107     0
GB108     0
GB109     0
GB110     0
GB111     0
GB112     0
GB113     0
GB114     0
GB115     0
GB116     0
GB117     0
GB118     0
GB119     0
GB120     0
GB121     0
GB122     0
GB123     0
GB124     0
GB125     0
GB126     0
GB127     0
GB128     0
GB129     0
GB130     0
GB131     0
GB132     0
GB133     0
GB134     0
GB135     0
GB136     0
GB137     0
GB138     0
GB139     0
GB140     0
GB141     0
GB142     0
GB143     0
GB144     0
GB145     0
GB146     0
GB147     0
GB148     0
GB149     0
GB150     0
GB151     0
GB152     0
GB153     0
GB154     0
GB155     0
GB156     0
GB157     0
GB158     0
GB159     0
GB160     0
GB161     0
GB162     0
GB163     0
GB164     0
GB165     0
GB166     0
GB167     0
GB168     0
GB169     0
GB170     0
GB171     0
GB172     0
GB173     0
GB174     0
GB175     0
GB176     0
GB177     0
GB178     0
GB179     0
GB180     0
GB181     0
GB182     0
GB183     0
GB184     0
GB185     0
GB186     0
GB187     0
GB188     0
GB189     0
GB190     0
GB191     0
GB192     0
GB193     0
GB194     0
GB195     0
GB196     0
GB197     0
GB198     0
GB199     0
GB200     0
GB201     0
GB202     0
GB203     0
GB204     0
GB205     0
GB206     0
GB207     0
GB208     0
GB209     0
GB210     0
GB211     0
GB212     0
GB213     0
GB214     0
GB215     0
GB216     0
GB217     0
GB218     0
GB219     0
GB220     0
GB221     0
GB222     0
GB223     0
GB224     0
GB225     0
GB226     0
GB227     0
GB228     0
GB229     0
GB230     0
GB231     0
GB232     0
GB233     0
GB234     0
GB235     0
GB236     0
GB237     0
GB238     0
GB239     0
GB240     0
GB241     0
GB242     0
GB243     0
GB244     0
GB245     0
GB246     0
GB247     0
GB248     0
GB249     0
GB250     0
GB251     0
GB252     0
GB253     0
GB254     0
GB255     0
GB256     0
GB257     0
GB258     0
GB259     0
GB260     0
GB261     0
GB262     0
GB263     0
GB264     0
GB265     0
GB266     0
GB267     0
GB268     0
GB269     0
GB270     0
GB271     0
GB272     0
GB273     0
GB274     0
GB275     0
GB276     0
GB277     0
GB278     0
GB279     0
GB280     0
GB281     0
GB282     0
GB283     0
GB284     0
GB285     0
GB286     0
GB287     0
GB288     0
GB289     0
GB290     0
GB291     0
GB292     0
GB293     0
GB294     0
GB295     0
GB296     0
GB297     0
GB298     0
GB299     0
GB300     0
GB301     0
GB302     0
GB303     0
GB304     0
GB305     0
GB306     0
GB307     0
GB308     0
GB309     0
GB310     0
GB311     0
GB312     0
GB313     0
GB314     0
GB315     0
GB316     0
GB317     0
GB318     0
GB319     0
GB320     0
GB321     0
GB322     0
GB323     0
GB324     0
GB325     0
GB326     0
GB327     0
GB328     0
GB329     0
GB330     0
GB331     0
GB332     0
GB333     0
GB334     0
GB335     0
GB336     0
GB337     0
GB338     0
GB339     0
GB340     0
GB341     0
GB342     0
GB343     0
GB344     0
GB345     0
GB346     0
GB347     0
GB348     0
GB349     0
GB350     0
GB351     0
GB352     0
GB353     0
GB354     0
GB355     0
GB356     0
GB357     0
GB358     0
GB359     0
GB360     0
GB361     0
GB362     0
GB363     0
GB364     0
GB365     0
GB366     0
GB367     0
GB368     0
GB369     0
GB370     0
GB371     0
GB372     0
GB373     0
GB374     0
GB375     0
GB376     0
GB377     0
GB378     0
GB379     0
GB380     0
GB381     0
GB382     0
GB383     0
GB384     0
GB385     0
GB386     0
GB387     0
GB388     0
GB389     0
GB390     0
GB391     0
GB392     0
GB393     0
GB394     0
GB395     0
GB396     0
GB397     0
GB398     0
GB399     0
GB400     0
GB401     0
GB402     0
GB403     0
GB404     0
GB405     0
GB406     0
GB407     0
GB408     0
GB409     0
GB410     0
GB411     0
GB412     0
GB413     0
GB414     0
GB415     0
GB416     0
GB417     0
GB418     0
GB419     0
GB420     0
GB421     0
GB422     0
GB423     0
GB424     0
GB425     0
GB426     0
GB427     0
GB428     0
GB429     0
GB430     0
GB431     0
GB432     0
GB433     0
GB434     0
GB435     0
GB436     0
GB437     0
GB438     0
GB439     0
GB440     0
GB441     0
GB442     0
GB443     0
GB444     0
GB445     0
GB446     0
GB447     0
GB448     0
GB449     0
GB450     0
GB451     0
GB452     0
GB453     0
GB454     0
GB455     0
GB456     0
GB457     0
GB458     0
GB459     0
GB460     0
GB461     0
GB462     0
GB463     0
GB464     0
GB465     0
GB466     0
GB467     0
GB468     0
GB469     0
GB470     0
GB471     0
GB472     0
GB473     0
GB474     0
GB475     0
GB476     0
GB477     0
GB478     0
GB479     0
GB480     0
GB481     0
GB482     0
GB483     0
GB484     0
GB485     0
GB486     0
GB487     0
GB488     0
GB489     0
GB490     0
GB491     0
GB492     0
GB493     0
GB494     0
GB495     0
GB496     0
GB497     0
GB498     0
GB499     0
GB500     0
GB501     0
GB502     0
GB503     0
GB504     0
GB505     0
GB506     0
GB507     0
GB508     0
GB509     0
GB510     0
GB511     0
GB512     0
GB513     0
GB514     0
GB515     0
GB516     0
GB517     0
GB518     0
GB519     0
GB520     0
GB521     0
GB522     0
GB523     0
GB524     0
GB525     0
GB526     0
GB527     0
GB528     0
GB529     0
GB530     0
GB531     0
GB532     0
GB533     0
GB534     0
GB535     0
GB536     0
GB537     0
GB538     0
GB539     0
GB540     0
GB541     0
GB542     0
GB543     0
GB544     0
GB545     0
GB546     0
GB547     0
GB548     0
GB549     0
GB550     0
GB551     0
GB552     0
GB553     0
GB554     0
GB555     0
GB556     0
GB557     0
GB558     0
GB559     0
GB560     0
GB561     0
GB562     0
GB563     0
GB564     0
GB565     0
GB566     0
GB567     0
GB568     0
GB569     0
GB570     0
GB571     0
GB572     0
GB573     0
GB574     0
GB575     0
GB576     0
GB577     0
GB578     0
GB579     0
GB580     0
GB581     0
GB582     0
GB583     0
GB584     0
GB585     0
GB586     0
GB587     0
GB588     0
GB589     0
GB590     0
GB591     0
GB592     0
GB593     0
GB594     0
GB595     0
GB596     0
GB597     0
GB598     0
GB599     0
GB600     0
GB601     0
GB602     0
GB603     0
GB604     0
GB605     0
GB606     0
GB607     0
GB608     0
GB609     0
GB610     0
GB611     0
GB612     0
GB613     0
GB614     0
GB615     0
GB616     0
GB617     0
GB618     0
GB619     0
GB620     0
GB621     0
GB622     0
GB623     0
GB624     0
GB625     0
GB626     0
GB627     0
GB628     0
GB629     0
GB630     0
GB631     0
GB632     0
GB633     0
GB634     0
GB635     0
GB636     0
GB637     0
GB638     0
GB639     0
GB640     0
GB641     0
GB642     0
GB643     0
GB644     0
GB645     0
GB646     0
GB647     0
GB648     0
GB649     0
GB650     0
GB651     0
GB652     0
GB653     0
GB654     0
GB655     0
GB656     0
GB657     0
GB658     0
GB659     0
GB660     0
GB661     0
GB662     0
GB663     0
GB664     0
GB665     0
GB666     0
GB667     0
GB668     0
GB669     0
GB670     0
GB671     0
GB672     0
GB673     0
GB674     0
GB675     0
GB676     0
GB677     0
GB678     0
GB679     0
GB680     0
GB681     0
GB682     0
GB683     0
GB684     0
GB685     0
GB686     0
GB687     0
GB688     0
GB689     0
GB690     0
GB691     0
GB692     0
GB693     0
GB694     0
GB695     0
GB696     0
GB697     0
GB698     0
GB699     0
GB700     0
GB701     0
GB702     0
GB703     0
GB704     0
GB705     0
GB706     0
GB707     0
GB708     0
GB709     0
GB710     0
GB711     0
GB712     0
GB713     0
GB714     0
GB715     0
GB716     0
GB717     0
GB718     0
GB719     0
GB720     0
GB721     0
GB722     0
GB723     0
GB724     0
GB725     0
GB726     0
GB727     0
GB728     0
GB729     0
GB730     0
GB731     0
GB732     0
GB733     0
GB734     0
GB735     0
GB736     0
GB737     0
GB738     0
GB739     0
GB740     0
GB741     0
GB742     0
GB743     0
GB744     0
GB745     0
GB746     0
GB747     0
GB748     0
GB749     0
GB750     0
GB751     0
GB752     0
GB753     0
GB754     0
GB755     0
GB756     0
GB757     0
GB758     0
GB759     0
GB760     0
GB761     0
GB762     0
GB763     0
GB764     0
GB765     0
GB766     0
GB767     0
GB768     0
GB769     0
GB770     0
GB771     0
GB772     0
GB773     0
GB774     0
GB775     0
GB776     0
GB777     0
GB778     0
GB779     0
GB780     0
GB781     0
GB782     0
GB783     0
GB784     0
GB785     0
GB786     0
GB787     0
GB788     0
GB789     0
GB790     0
GB791     0
GB792     0
GB793     0
GB794     0
GB795     0
GB796     0
GB797     0
GB798     0
GB799     0
GB800     0
GB801     0
GB802     0
GB803     0
GB804     0
GB805     0
GB806     0
GB807     0
GB808     0
GB809     0
GB810     0
GB811     0
GB812     0
GB813     0
GB814     0
GB815     0
GB816     0
GB817     0
GB818     0
GB819     0
GB820     0
GB821     0
GB822     0
GB823     0
GB824     0
GB825     0
GB826     0
GB827     0
GB828     0
GB829     0
GB830     0
GB831     0
GB832     0
GB833     0
GB834     0
GB835     0
GB836     0
GB837     0
GB838     0
GB839     0
GB840     0
GB841     0
GB842     0
GB843     0
GB844     0
GB845     0
GB846     0
GB847     0
GB848     0
GB849     0
GB850     0
GB851     0
GB852     0
GB853     0
GB854     0
GB855     0
GB856     0
GB857     0
GB858     0
GB859     0
GB860     0
GB861     0
GB862     0
GB863     0
GB864     0
GB865     0
GB866     0
GB867     0
GB868     0
GB869     0
GB870     0
GB871     0
GB872     0
GB873     0
GB874     0
GB875     0
GB876     0
GB877     0
GB878     0
GB879     0
GB880     0
GB881     0
GB882     0
GB883     0
GB884     0
GB885     0
GB886     0
GB887     0
GB888     0
GB889     0
GB890     0
GB891     0
GB892     0
GB893     0
GB894     0
GB895     0
GB896     0
GB897     0
GB898     0
GB899     0
GB900     0
GB901     0
GB902     0
GB903     0
GB904     0
GB905     0
GB906     0
GB907     0
GB908     0
GB909     0
GB910     0
GB911     0
GB912     0
GB913     0
GB914     0
GB915     0
GB916     0
GB917     0
GB918     0
GB919     0
GB920     0
GB921     0
GB922     0
GB923     0
GB924     0
GB925     0
GB926     0
GB927     0
GB928     0
GB929     0
GB930     0
GB931     0
GB932     0
GB933     0
GB934     0
GB935     0
GB936     0
GB937     0
GB938     0
GB939     0
GB940     0
GB941     0
GB942     0
GB943     0
GB944     0
GB945     0
GB946     0
GB947     0
GB948     0
GB949     0
GB950     0
GB951     0
GB952     0
GB953     0
GB954     0
GB955     0
GB956     0
GB957     0
GB958     0
GB959     0
GB960     0
GB961     0
GB962     0
GB963     0
GB964     0
GB965     0
GB966     0
GB967     0
GB968     0
GB969     0
GB970     0
GB971     0
GB972     0
GB973     0
GB974     0
GB975     0
GB976     0
GB977     0
GB978     0
GB979     0
GB980     0
GB981     0
GB982     0
GB983     0
GB984     0
GB985     0
GB986     0
GB987     0
GB988     0
GB989     0
GB990     0
GB991     0
GB992     0
GB993     0
GB994     0
GB995     0
GB996     0
GB997     0
GB998     0
GB999     0
GB1000    0

```

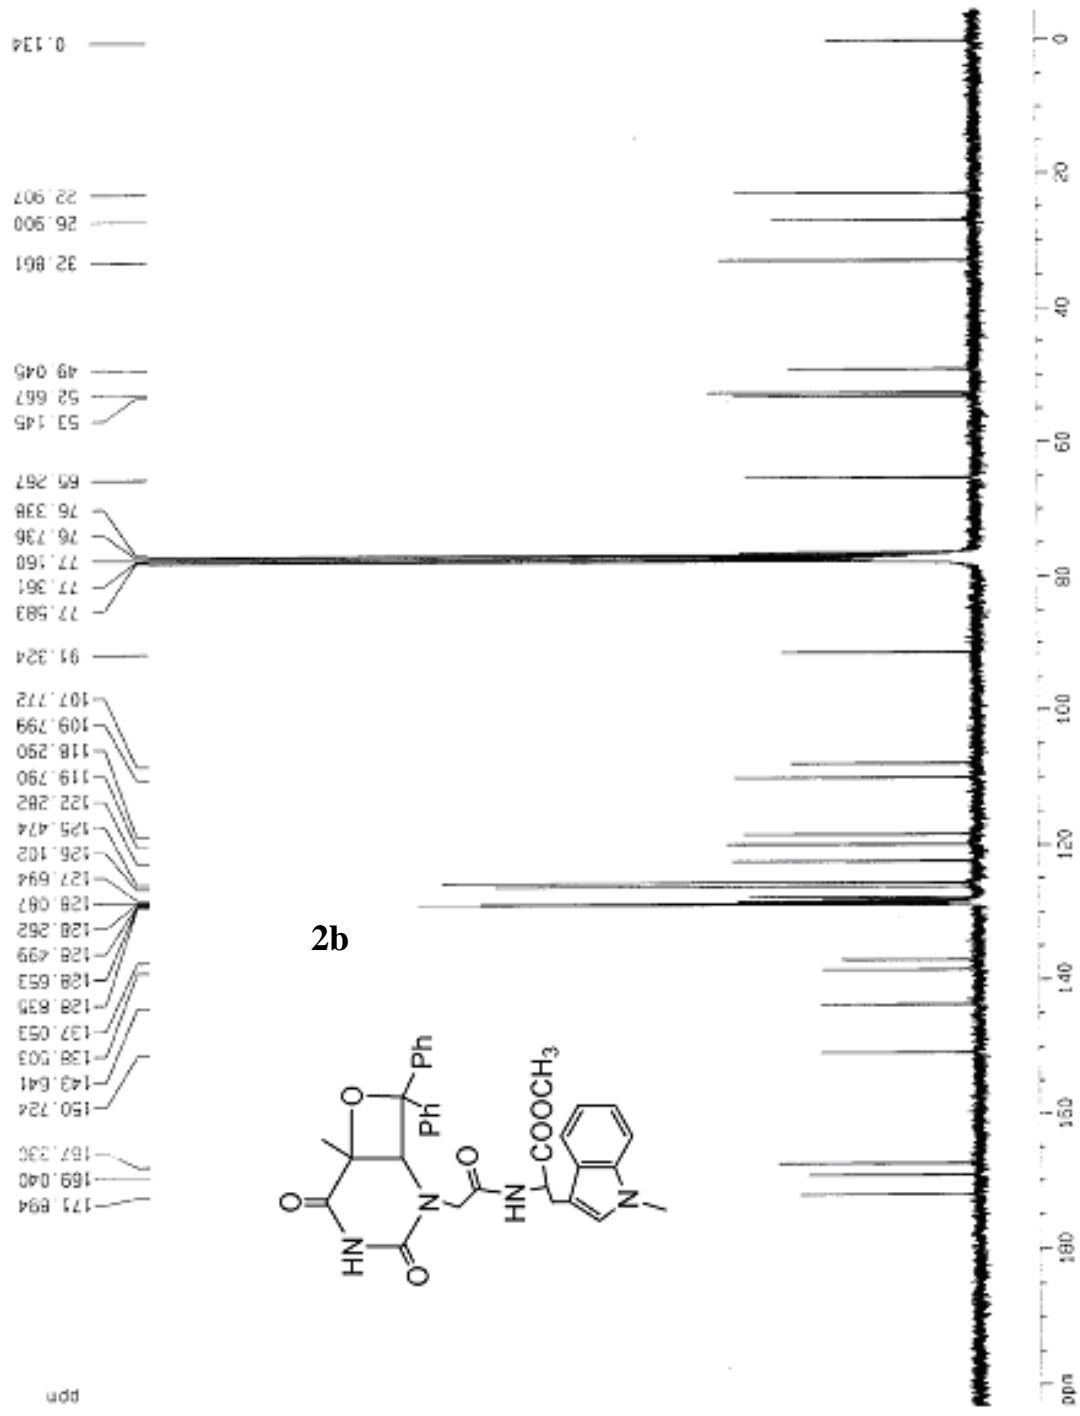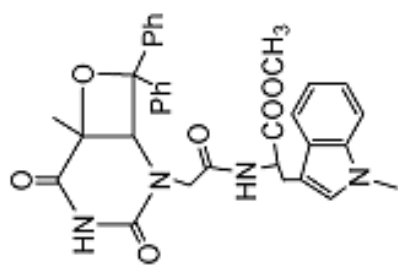

Figure S18 The <sup>13</sup>C NMR spectrum of compound 3

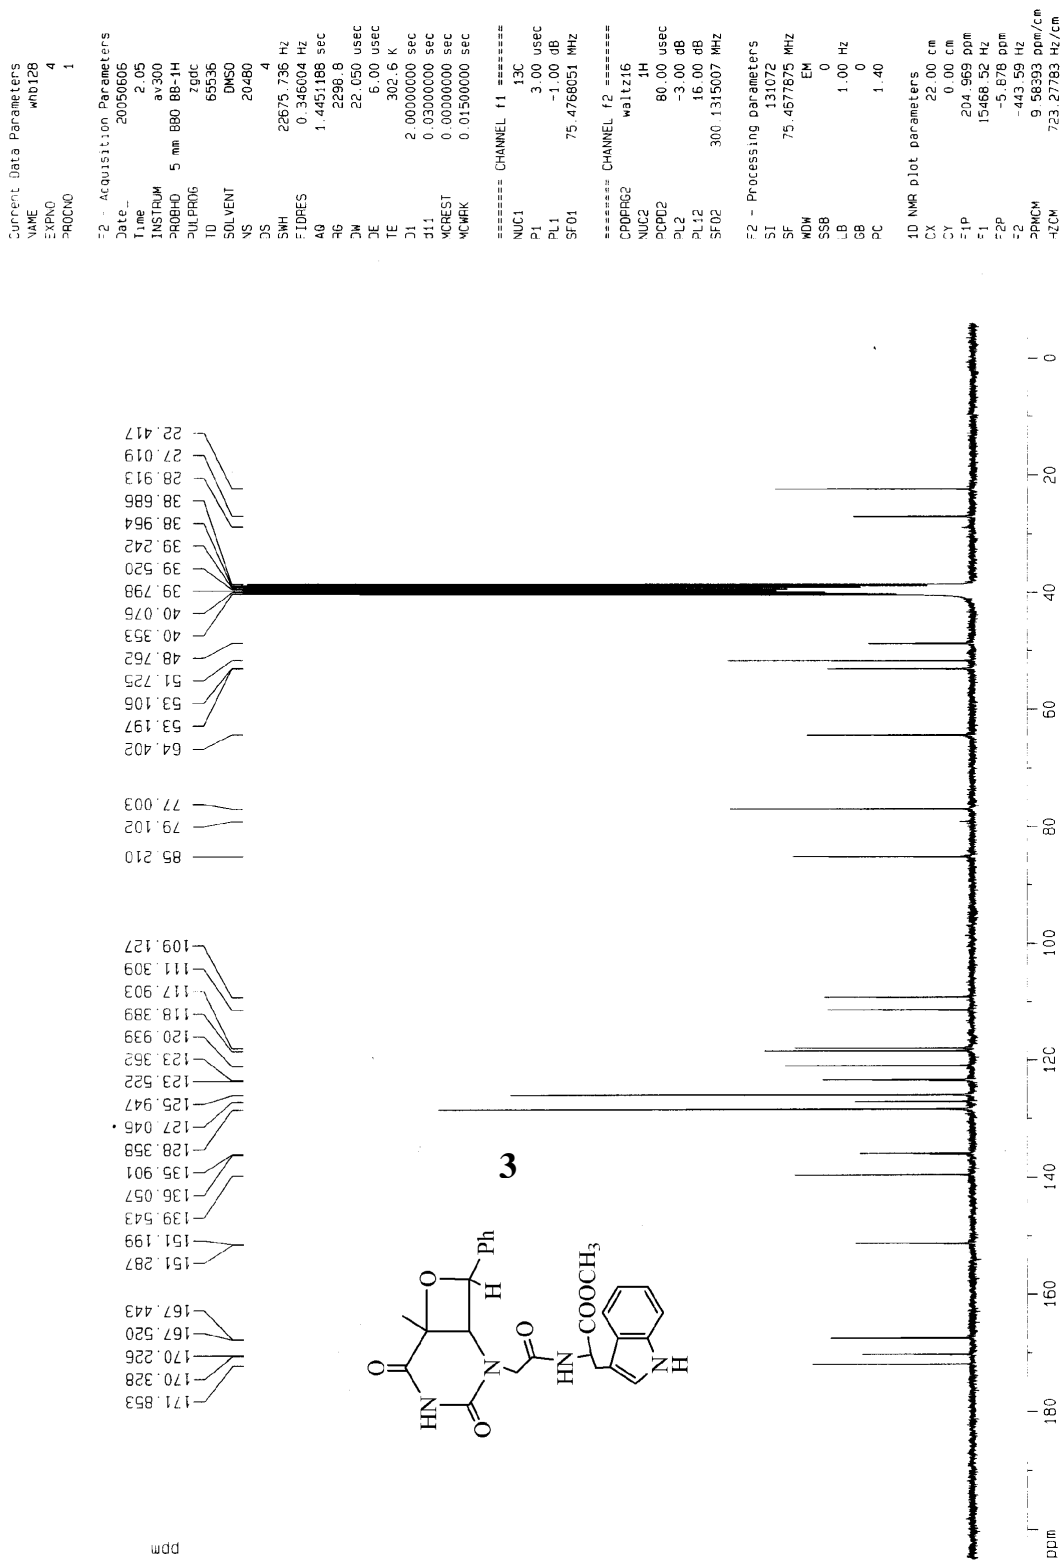

Supplement: b514921e.pdf [file b514921e.pdf]
